# Supplementary material for: 2024 HRS perspective on advancing workflows for CIED remote monitoring
Source: PubMed Central journal article supplement (PMC11721723; doi:10.1016/j.hroo.2024.09.012), 2024-09-27
Supplement: mmc1.pdf [file mmc1.pdf]

|                                       |                                                                                                                                     |                                                             |      |                                           |      |      |                  |      |      |
|---------------------------------------|-------------------------------------------------------------------------------------------------------------------------------------|-------------------------------------------------------------|------|-------------------------------------------|------|------|------------------|------|------|
| Neal Lippman, MD, FHRS                | Arrhythmia Consultants of Connecticut, LLC, Hartford, Connecticut                                                                   | 1; Boston Scientific<br>3; Abbott                           | None | None                                      | None | None | None             | None | None |
| G. Stuart Mendenhall, MD              | Scripps Memorial Hospital La Jolla, La Jolla, California                                                                            | 1; Medtronic, Inc.                                          | None | None                                      | None | None | 1 ; Grektek, LLC | None | None |
| Ratika Parkash, MD, MS, FHRS          | Dalhousie University, Halifax, Canada                                                                                               | 0; Medtronic, Inc., 1; Servier                              | None | 4; Novartis, 5; Abbot, 7; Medtronic, Inc. | None | None | None             | None | None |
| Nicholas T. Skipitaris, MBA, MD, FHRS | Department of Cardiology, Lenox Hill Hospital, Northwell Health, New York City, New York                                            | 1; Medtronic, Inc., Biotronik<br>GE Healthcare              | None | None                                      | None | None | None             | None | None |
| Paul R. Steiner, MD, FHRS             | Dartmouth Hitchcock Medical Center, Lebanon, New Hampshire                                                                          | None                                                        | None | None                                      | None | None | None             | None | None |
| Elaine Wan, MD, FHRS                  | Division of Cardiology, Department of Medicine, Vagelos College of Physicians and Surgeons, Columbia University, New York, New York | 1; Sanofi, Medtronic, Abbott, Boston Scientific, Cardiologs | None | 7; National Institutes for Health         | None | None | None             | None | None |

Number value: **0** = \$0; **1** = ≤ \$10,000; **2** = > \$10,000 to ≤ \$25,000; **3** = > \$25,000 to ≤ \$50,000; **4** = > \$50,000 to ≤ \$100,000; **5** = > \$100,000.

\*Research and fellowship support are classed as programmatic support. Sources of programmatic support are disclosed but are not regarded as relevant relationships with industry for writing group members.
